# Supplementary material
Source: publisher site journal article supplement (https://www.dovepress.com/article/534282)
Supplement: Supplementary file 1 [file 534282%20Supplementary%20Figures.docx]

**
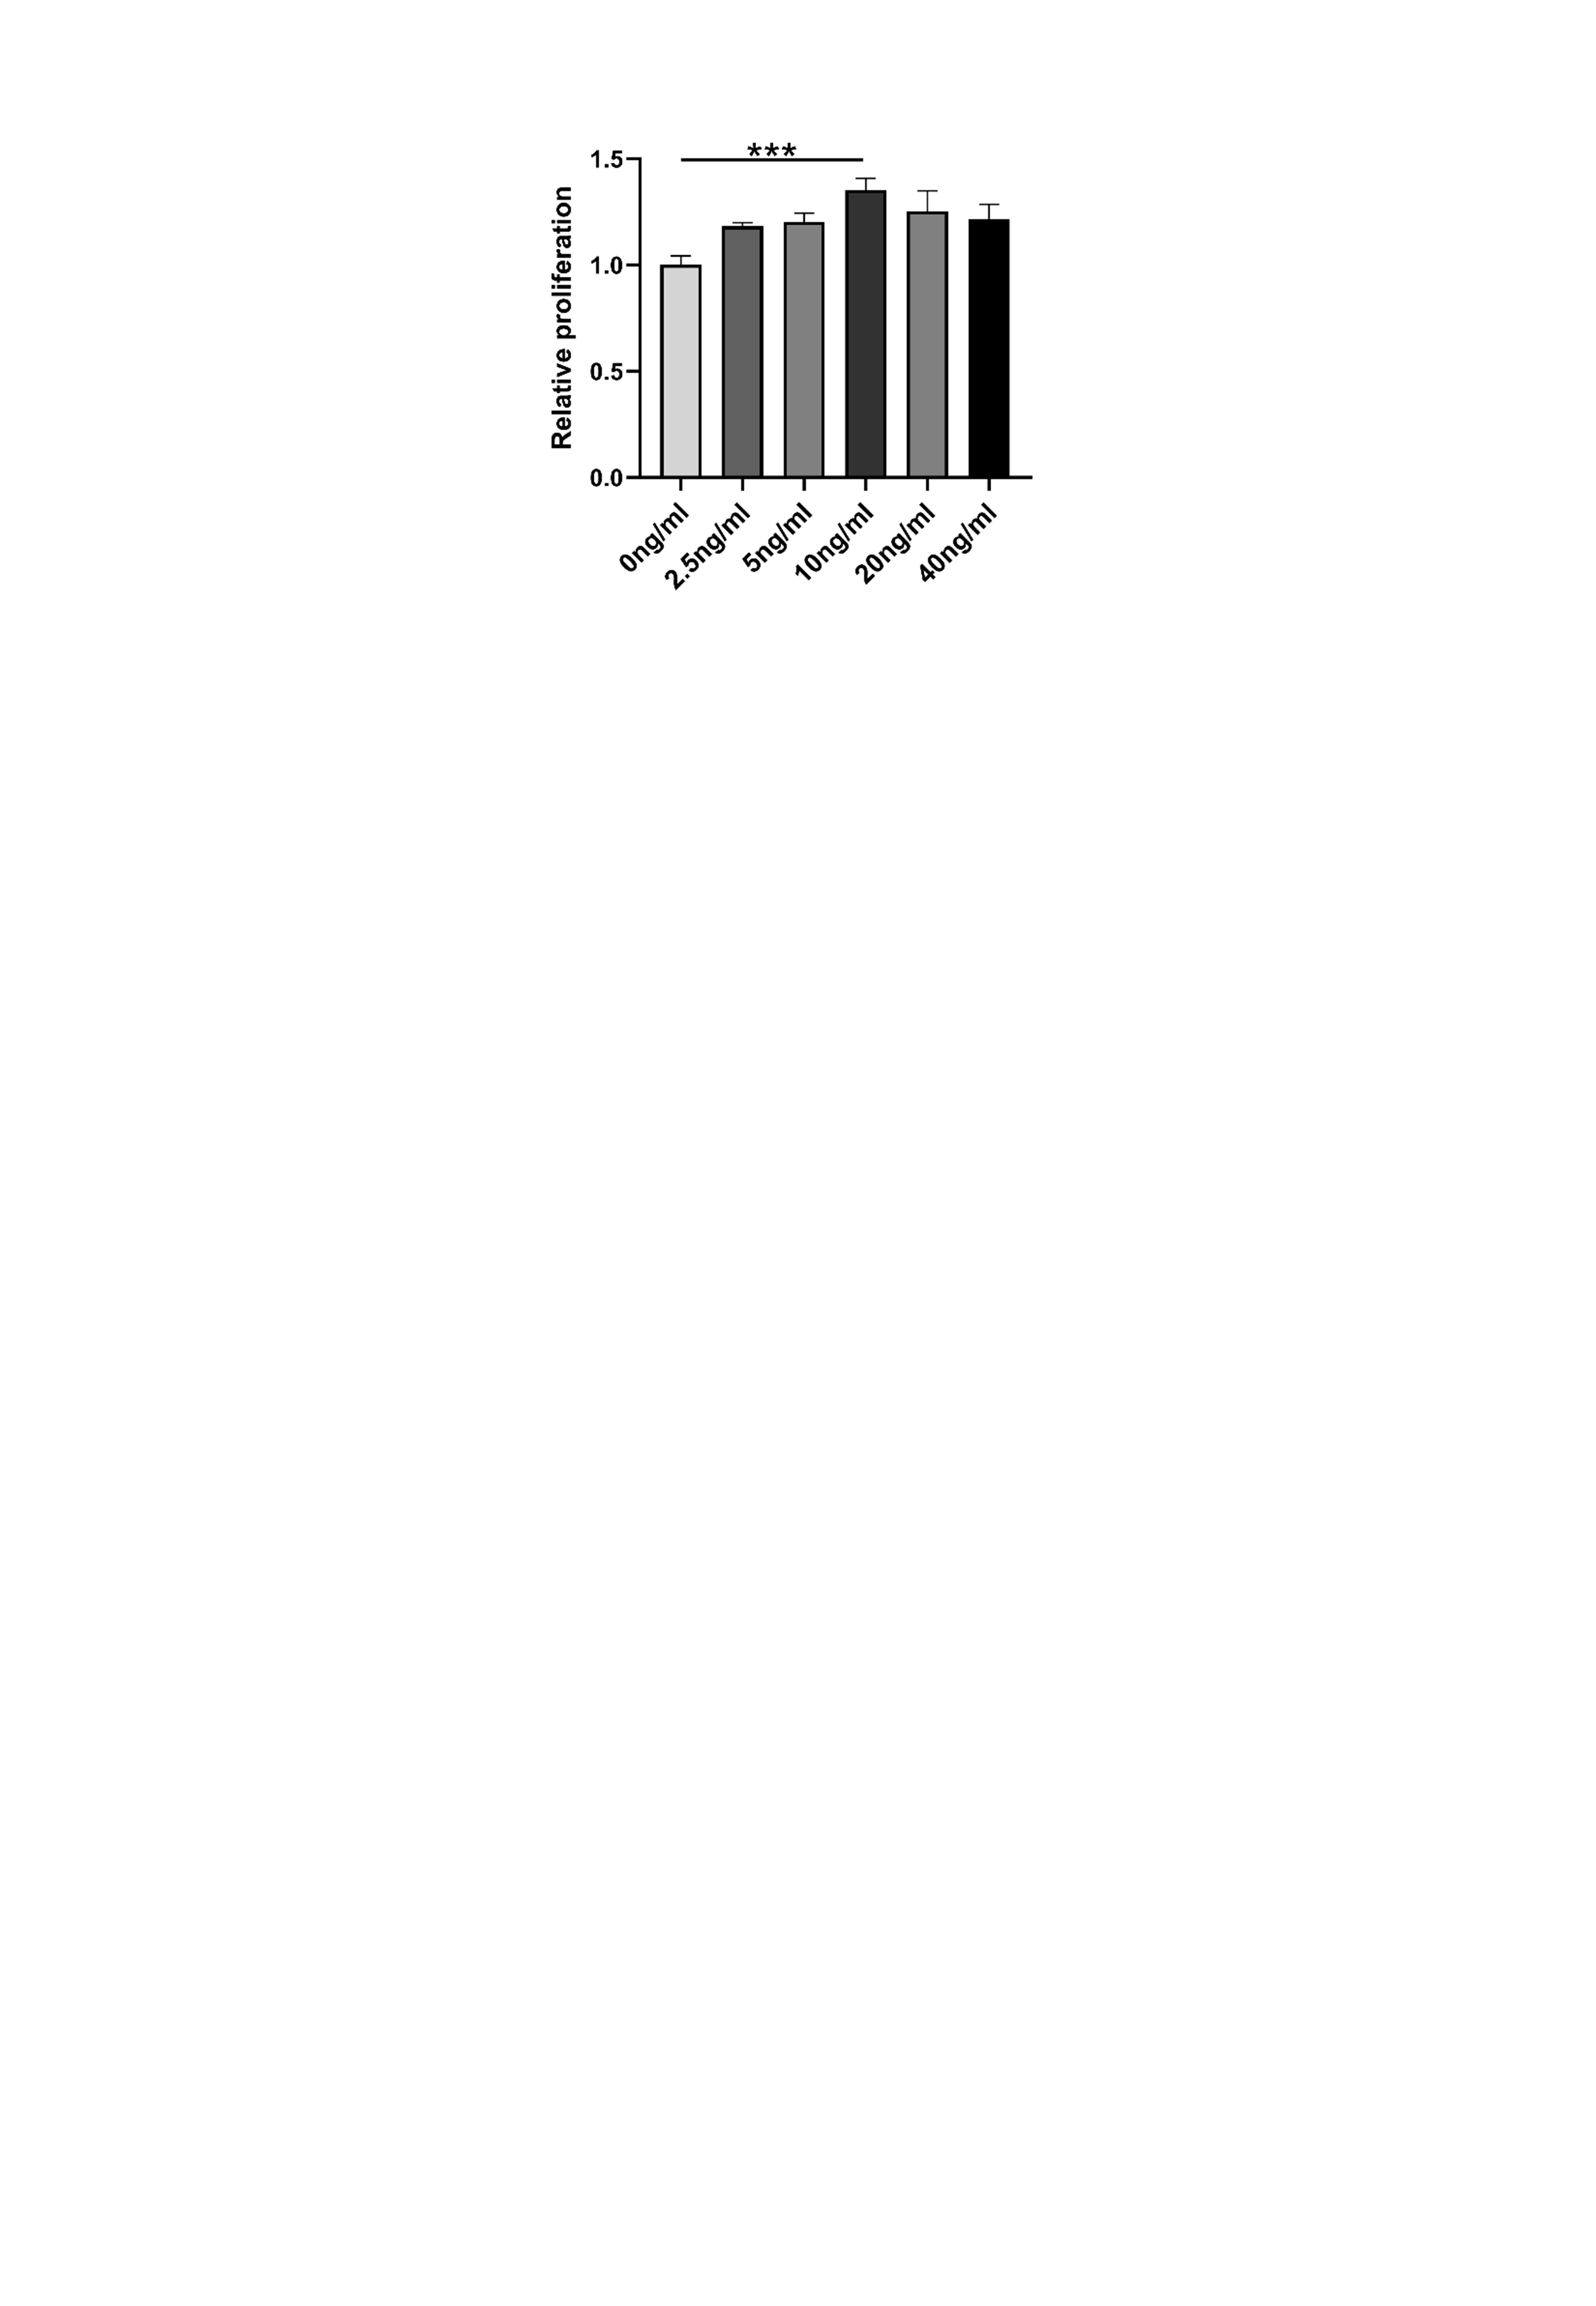
**

**Supplementary Figure 1.** Screening for optimal TNF-α stimulation concentration.HUVECs were treated with TNF-α (2.5 ng/mL, 5 ng/mL, 10 ng/mL, 20 ng/mL, and 40 ng/mL) for 24 h, and cell proliferation was assessed by CCK-8 assay. The 10 ng/mL TNF-α treatment exhibited the most pronounced proliferative effect compared to untreated HUVECs. The data are presented as the means ± standard deviation of three independent experiments. ****p* < 0.001.


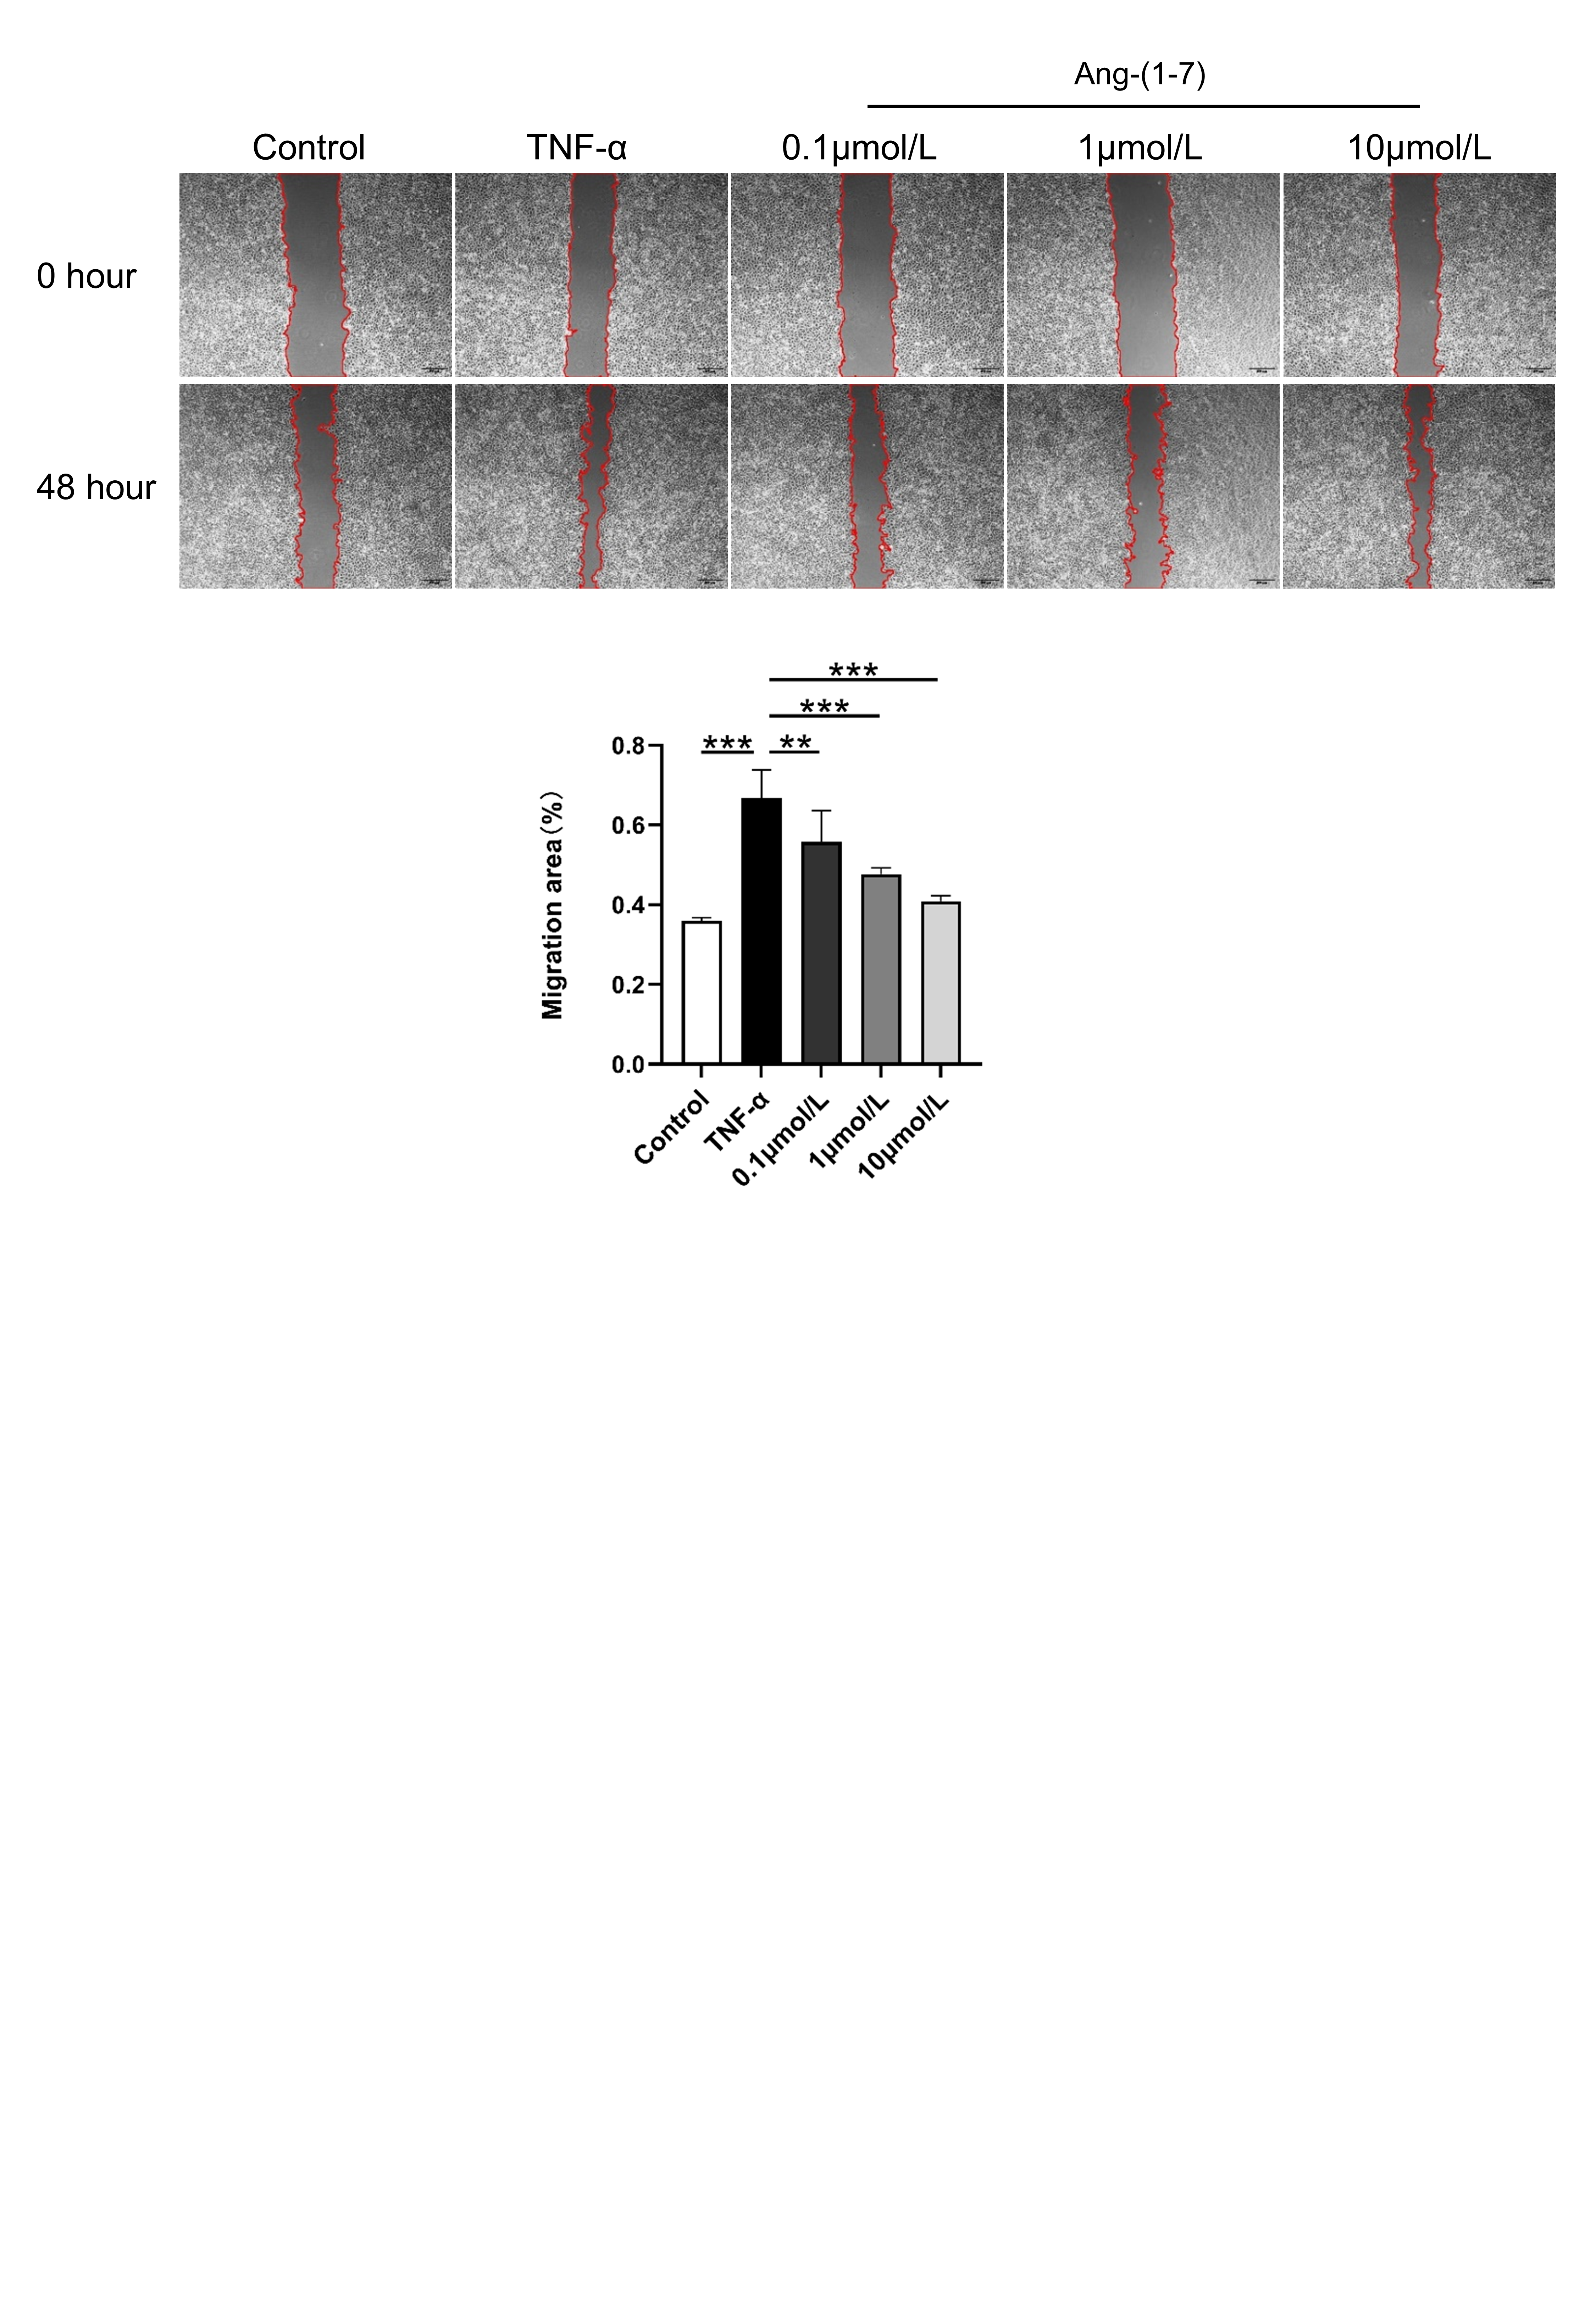


**Supplementary Figure 2.** Screening for optimal Ang-(1-7) treatment concentration. HUVECs were treated with TNF-α (10 ng/mL) in the presence or absence of Ang-(1-7) (0.1 μmol/L, 1 μmol/L, or 10 μmol/L) for 24 h. Cell migration was assessed by wound healing assay. The 10 μmol/L Ang-(1-7) treatment showed the strongest inhibitory effect on TNF-α-stimulated HUVEC migration compared to untreated control. The data are presented as the means ± standard deviation of three independent experiments. ***p* < 0.01, ****p* < 0.001.
